# Supplementary material for: Residential Road Traffic Noise and High Depressive Symptoms after Five Years of Follow-up: Results from the Heinz Nixdorf Recall Study
Source: PubMed Central journal article supplement (PMC4858388; doi:10.1289/ehp.1409400), 2015-11-25
Supplement: ehp.1409400.s001.acco.pdf [file ehp.1409400.s001.acco.pdf]

**Note to readers with disabilities:** *EHP* strives to ensure that all journal content is accessible to all readers. However, some figures and Supplemental Material published in *EHP* articles may not conform to [508 standards](#) due to the complexity of the information being presented. If you need assistance accessing journal content, please contact [ehp508@niehs.nih.gov](mailto:ehp508@niehs.nih.gov). Our staff will work with you to assess and meet your accessibility needs within 3 working days.

## **Supplemental Material**

### **Residential Road Traffic Noise and High Depressive Symptoms after Five Years of Follow-up: Results from the Heinz Nixdorf Recall Study**

Ester Orban, Kelsey McDonald, Robynne Sutcliffe, Barbara Hoffmann, Kateryna B. Fuks,  
Nico Dragano, Anja Viehmann, Raimund Erbel, Karl-Heinz Jöckel, Noreen Pundt, and  
Susanne Moebus

#### **Table of Contents**

**Table S1.** Characteristics of the Heinz Nixdorf Recall study participants that were excluded from our analysis.

**Table S2.** Relative risks (with 95% confidence intervals) of high depressive symptoms at follow-up in study participants exposed to residential nighttime road traffic noise ( $L_{\text{night}} > 50$  dB(A) compared with  $\leq 50$  dB(A).

**Table S3.** Results of the sensitivity analyses, showing relative risks (with 95% confidence intervals) of high depressive symptoms at follow-up in study participants exposed to residential nighttime road traffic noise ( $L_{\text{night}} > 50$  dB(A) compared with  $\leq 50$  dB(A).

**Figure S1.** Directed acyclic graph (DAG) on the hypothesized associations between road traffic noise, depressive symptoms and covariates in our study. Source: Created with DAGitty ([www.dagitty.net](http://www.dagitty.net), Textor et al. 2011).

**Figure S2.** Distribution of Heinz Nixdorf Recall study participants ( $n=3,300$ ) by residential level of annual mean 24-hour ( $L_{\text{den}}$ ) and nighttime noise ( $L_{\text{night}}$ ) at the residential locations.

**Figure S3.** Relative risks and 95% confidence intervals of depressive symptoms at follow-up in association with exposure to different categories of nighttime noise compared with the

lowest noise category [ $\leq 50$  dB(A); n=2,298], adjusted for baseline age, sex, education, income, economic activity, neighborhood-level socioeconomic status and traffic proximity (model 1).

**Table S1.** Characteristics of the Heinz Nixdorf Recall study participants that were excluded from our analysis.

Drop out 1 refers to those excluded due to missing information on depressive symptoms (CES-D, antidepressant medication use) or prevalent depressive symptoms (CES-D  $\geq 17$  and/or antidepressant medication use) at baseline. Drop out 2 refers to participants who died between baseline and follow-up, or had insufficient information on CES-D/antidepressant medication use to assess depressive symptoms at follow-up (see also table 1).

| <b>Characteristics</b>                              | <b>Drop out 1<br/>(N=1,025)</b>             | <b>Drop out 2<br/>(N=489)</b>               |
|-----------------------------------------------------|---------------------------------------------|---------------------------------------------|
|                                                     | N (%), mean $\pm$ SD, or<br>median (Q1, Q3) | N (%), mean $\pm$ SD, or<br>median (Q1, Q3) |
| <b>Baseline</b>                                     |                                             |                                             |
| Exposed to $L_{den} > 55$ dB(A)                     | 354 (34.5)                                  | 186 (38.0)                                  |
| Exposed to $L_{night} > 50$ dB(A)                   | 243 (23.3)                                  | 138 (28.2)                                  |
| Men                                                 | 411 (40.1)                                  | 269 (55.0)                                  |
| Age (years)                                         | 59.6 $\pm$ 8.0                              | 62.2 $\pm$ 8.3                              |
| CES-D $\geq 17$ and/or antidepressant<br>medication | 593 (100.0)                                 | 0 (0.0)                                     |
| N missing                                           | 432                                         | 0                                           |
| CES-D $\geq 17$                                     | 449 (52.5)                                  | 0 (0.0)                                     |
| N missing                                           | 169                                         | 0                                           |
| Antidepressant medication                           | 221 (31.1)                                  | 0 (0.0)                                     |
| N missing                                           | 314                                         | 0                                           |
| Insomnia                                            | 220 (21.8)                                  | 54 (11.3)                                   |
| N missing                                           | 17                                          | 10                                          |
| Number of co-morbidities <sup>a</sup>               |                                             |                                             |
| 0                                                   | 366 (35.7)                                  | 155 (31.7)                                  |
| 1                                                   | 295 (28.8)                                  | 155 (31.7)                                  |
| $\geq 2$                                            | 364 (35.5)                                  | 179 (36.6)                                  |
| Reported lifetime prevalence of<br>depression       | 213 (24.5)                                  | 36 (8.9)                                    |
| N missing                                           | 157                                         | 86                                          |
| Body mass index                                     | 28.2 $\pm$ 4.8                              | 28.4 $\pm$ 4.6                              |
| N missing                                           | 17                                          | 2                                           |
| Smoking                                             |                                             |                                             |
| current                                             | 268 (26.3)                                  | 149 (30.7)                                  |
| former                                              | 304 (29.9)                                  | 161 (33.1)                                  |
| never                                               | 446 (43.8)                                  | 176 (36.2)                                  |
| N missing                                           | 7                                           | 3                                           |

(Table S1 continued)

|                                            |                       |                       |
|--------------------------------------------|-----------------------|-----------------------|
| Distance to nearest major road (meters)    | 811.6 (428.1, 1400.1) | 859.2 (407.2, 1507.0) |
| N missing                                  | 3                     | 1                     |
| Unemployed in neighborhood (%)             | 13.0 ± 3.7            | 12.9 ± 3.5            |
| Education <sup>b</sup>                     |                       |                       |
| ≤ 10 years                                 | 194 (18.9)            | 92 (18.8)             |
| 11–13 years                                | 576 (56.2)            | 262 (53.6)            |
| 14–17 years                                | 181 (17.7)            | 111 (22.7)            |
| ≥ 18 years                                 | 74 (7.2)              | 24 (4.9)              |
| N missing                                  | 0                     | 1                     |
| Household net income                       |                       |                       |
| Quartile 1 (low)                           | 318 (33.8)            | 149 (32.5)            |
| Quartile 2                                 | 217 (23.1)            | 111 (24.2)            |
| Quartile 3                                 | 229 (24.3)            | 107 (23.3)            |
| Quartile 4 (high)                          | 177 (18.8)            | 92 (20.0)             |
| N missing                                  | 84                    | 30                    |
| Economic activity                          |                       |                       |
| employed                                   | 354 (34.9)            | 132 (27.6)            |
| inactive                                   | 567 (55.9)            | 330 (67.9)            |
| unemployed                                 | 93 (9.2)              | 22 (4.5)              |
| N missing                                  | 11                    | 3                     |
| City of residence                          |                       |                       |
| Mülheim                                    | 355 (34.7)            | 163 (33.3)            |
| Bochum                                     | 270 (26.4)            | 142 (29.0)            |
| Essen                                      | 399 (39.0)            | 184 (37.6)            |
| <b>Follow-up</b>                           |                       |                       |
| CES-D ≥17 and/or antidepressant medication | 308 (36.8)            | 0 (0.0)               |
| N missing                                  | 188                   | 489                   |
| CES-D ≥17                                  | 226 (26.8)            | 0 (0.0)               |
| N missing                                  | 180                   | 441                   |
| Antidepressant medication                  | 140 (16.7)            | 0 (0.0)               |
| N missing                                  | 186                   | 466                   |

Q1 and Q3= quartile 1 (25<sup>th</sup> percentile) and quartile 3 (75<sup>th</sup> percentile)

<sup>a</sup> Of the following: myocardial infarction, heart failure, stroke, diabetes, emphysema, asthma, cancer, rheumatism, slipped disc, migraine

<sup>b</sup> Combining school and vocational training

**Table S2.** Relative risks (with 95% confidence intervals) of high depressive symptoms at follow-up in study participants exposed to residential nighttime road traffic noise ( $L_{\text{night}} > 50$  dB(A) compared with  $\leq 50$  dB(A).

| <b>Model</b>               | <b>N cases</b> | <b>N total</b> | <b>RR (95% CI)</b> |
|----------------------------|----------------|----------------|--------------------|
| <b>Unadjusted</b>          |                |                |                    |
| total                      | 302            | 3,300          | 1.30 (1.03, 1.64)  |
| men                        | 101            | 1,715          | 1.31 (0.87, 1.97)  |
| women                      | 201            | 1,585          | 1.31 (0.99, 1.73)  |
| <b>Model 1<sup>a</sup></b> |                |                |                    |
| total                      | 279            | 3,098          | 1.29 (1.01, 1.64)  |
| men                        | 98             | 1,650          | 1.19 (0.77, 1.82)  |
| women                      | 181            | 1,448          | 1.36 (1.01, 1.82)  |
| <b>Model 2<sup>b</sup></b> |                |                |                    |
| total                      | 278            | 3,089          | 1.30 (1.02, 1.65)  |
| men                        | 98             | 1,644          | 1.19 (0.76, 1.86)  |
| women                      | 180            | 1,445          | 1.37 (1.02, 1.83)  |
| <b>Model 3<sup>c</sup></b> |                |                |                    |
| total                      | 276            | 3,075          | 1.29 (1.01, 1.64)  |
| men                        | 97             | 1,637          | 1.14 (0.74, 1.76)  |
| women                      | 179            | 1,438          | 1.39 (1.03, 1.86)  |

<sup>a</sup> Adjusted for age, sex (except in the sex-stratified analysis), education, income, economic activity, neighborhood-level socioeconomic status, traffic proximity

<sup>b</sup> Additionally adjusted for body mass index, smoking

<sup>c</sup> Additionally adjusted for co-morbidities, insomnia

**Table S3.** Results of the sensitivity analyses, showing relative risks (with 95% confidence intervals) of high depressive symptoms at follow-up in study participants exposed to residential nighttime road traffic noise ( $L_{\text{night}} > 50$  dB(A) compared with  $\leq 50$  dB(A).

| Subgroup                                                            | N cases | N total <sup>a</sup> | RR (95% CI) <sup>b</sup> |
|---------------------------------------------------------------------|---------|----------------------|--------------------------|
| Education                                                           |         |                      |                          |
| $\leq 13$ years                                                     | 214     | 1,968                | 1.38 (1.05, 1.81)        |
| $> 13$ years                                                        | 65      | 1,130                | 1.01 (0.57, 1.79)        |
| Moved during follow up                                              |         |                      |                          |
| yes                                                                 | 61      | 502                  | 1.34 (0.82, 2.20)        |
| no                                                                  | 218     | 2,596                | 1.27 (0.96, 1.68)        |
| Insomnia                                                            |         |                      |                          |
| yes                                                                 | 55      | 281                  | 1.56 (0.96, 2.52)        |
| no                                                                  | 222     | 2,803                | 1.24 (0.94, 1.63)        |
| City of residence                                                   |         |                      |                          |
| Mülheim/R                                                           | 99      | 1,162                | 1.26 (0.85, 1.87)        |
| Bochum                                                              | 89      | 927                  | 1.36 (0.88, 2.11)        |
| Essen                                                               | 91      | 1,009                | 1.23 (0.79, 1.90)        |
| Excluded lifetime prevalence of depression at baseline <sup>c</sup> | 189     | 2,382                | 1.31 (0.98, 1.76)        |
| Noise cutoff $L_{\text{night}} > 60$ dB(A)                          | 279     | 3,098                | 1.20 (0.75, 1.93)        |
| CES-D $\geq 17$ only to define outcome                              | 227     | 3,469                | 1.31 (1.00, 1.71)        |
| Antidepressant medication only to define outcome                    | 144     | 3,467                | 1.07 (0.74, 1.55)        |

<sup>a</sup> max. total N in model 1=3,098, numbers differing from those in table 1 reflect missing covariate data (in model 1)

<sup>b</sup> Adjusted for age, sex, education (not in the education-stratified analysis), income, economic activity, neighborhood-level socioeconomic status and traffic proximity (model 1); no substantial differences were in unadjusted and model 2 and 3 results (data not shown)

<sup>c</sup> Excluded 176 who reported having/having ever had depression and 605 with missing data

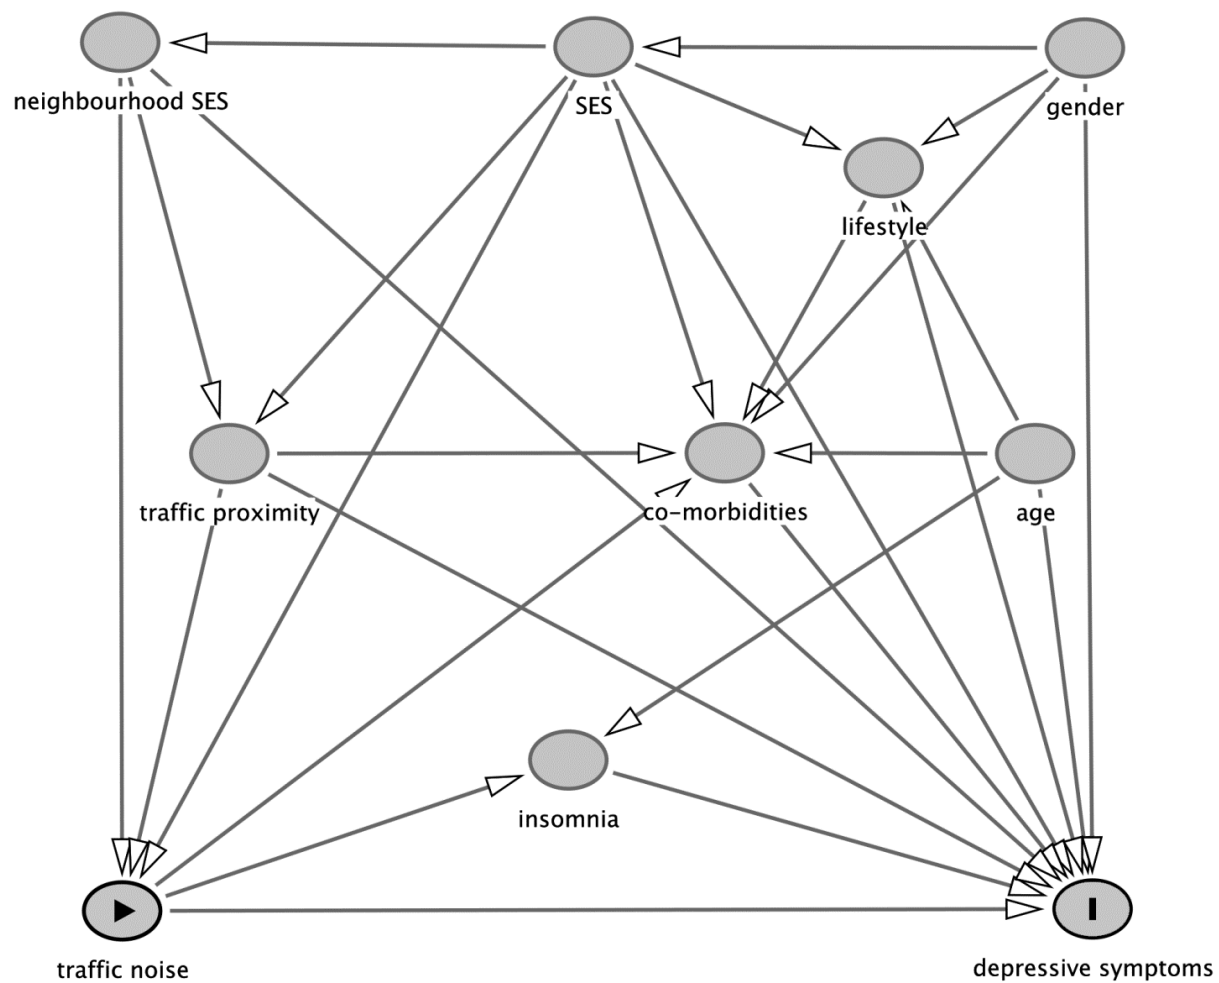

**Figure S1.** Directed acyclic graph (DAG) on the hypothesized associations between road traffic noise, depressive symptoms and covariates in our study. Source: Created with DAGitty ([www.dagitty.net](http://www.dagitty.net), Textor et al. 2011)

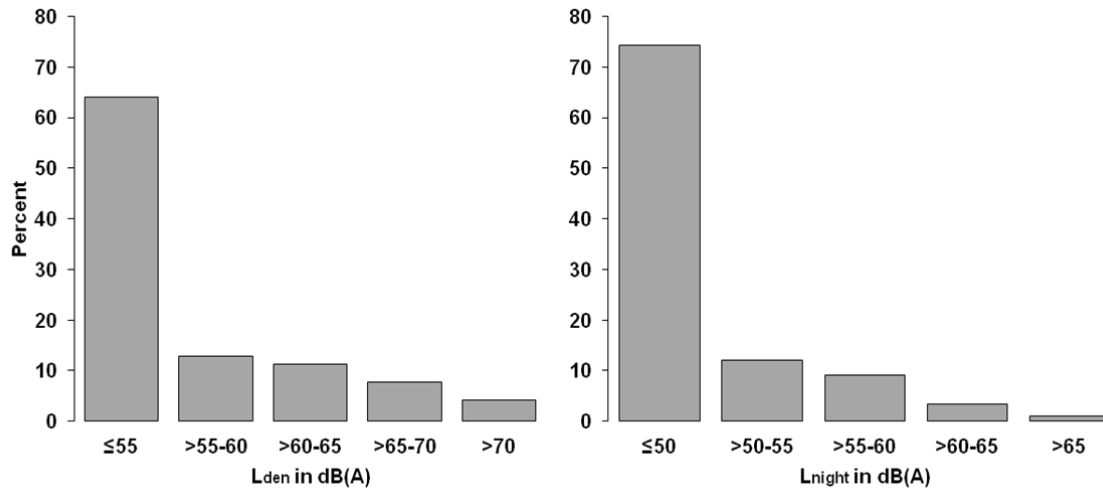

**Figure S2.** Distribution of Heinz Nixdorf Recall study participants (n=3,300) by residential level of annual mean 24-hour ( $L_{den}$ ) and nighttime noise ( $L_{night}$ ) at the residential locations.



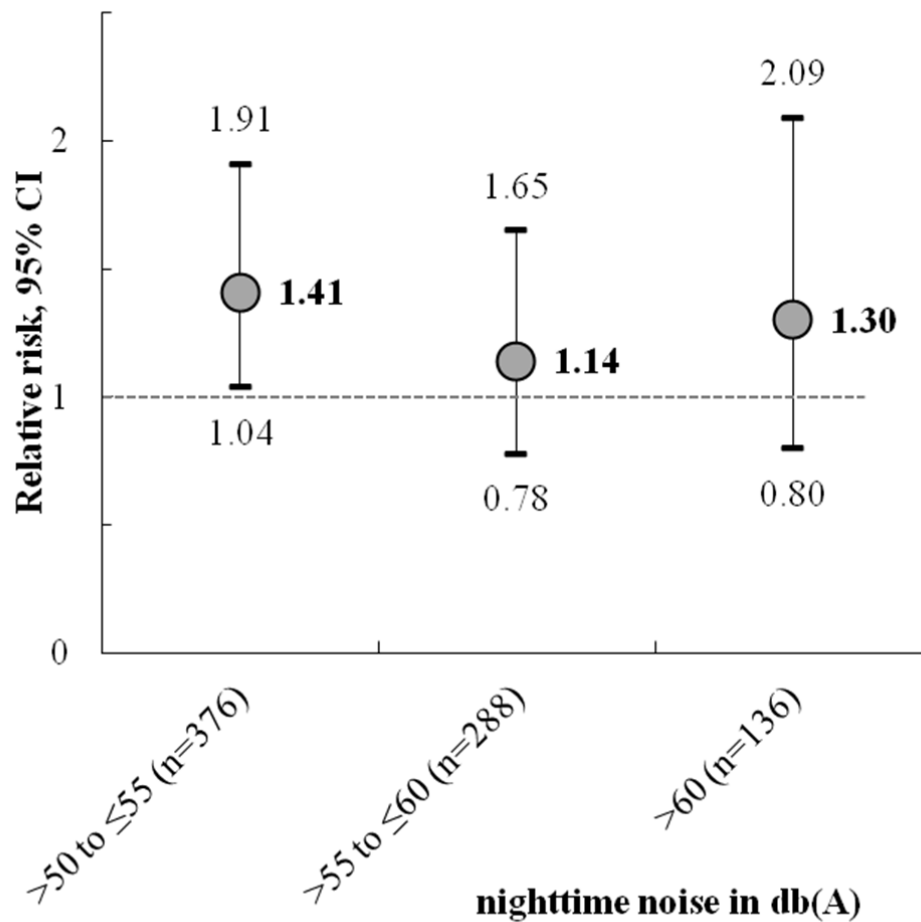

**Figure S3.** Relative risks and 95% confidence intervals of depressive symptoms at follow-up in association with exposure to different categories of nighttime noise compared with the lowest noise category [ $\leq 50$  dB(A);  $n=2,298$ ], adjusted for baseline age, sex, education, income, economic activity, neighborhood-level socioeconomic status and traffic proximity (model 1).
